# Supplementary material for: Structural and morphological investigation of (R)-α-phenylethylammonium-oxalate in bulk vs. nanowires on a modified substrate surface
Source: Royal Society of Chemistry journal article supplement (doi:10.1039/d4ra00558a), 2024-01-01
Supplement: d4ra00558a1.pdf [file d4ra00558a1.pdf]

## Structural and morphological investigation of (R)- $\alpha$ -phenylethylammonium-oxalate in bulk vs. nanowires on modified substrate surface

Sanja Burazer,<sup>\*a,b</sup> Tereza Košutová,<sup>b</sup> Lukáš Horák,<sup>b</sup> Milan Dopita,<sup>b</sup> Ana Šantić<sup>a</sup> and Anna Fučíková<sup>b</sup>

<sup>a</sup> Ruđer Bošković Institute, Bijenička cesta 54, 10000 Zagreb, Croatia.

<sup>b</sup> Faculty of Mathematics and Physics, Charles University, Ke Karlovu 3, 12000 Prague, Czech Republic.

\*Sanja.Burazer@irb.hr

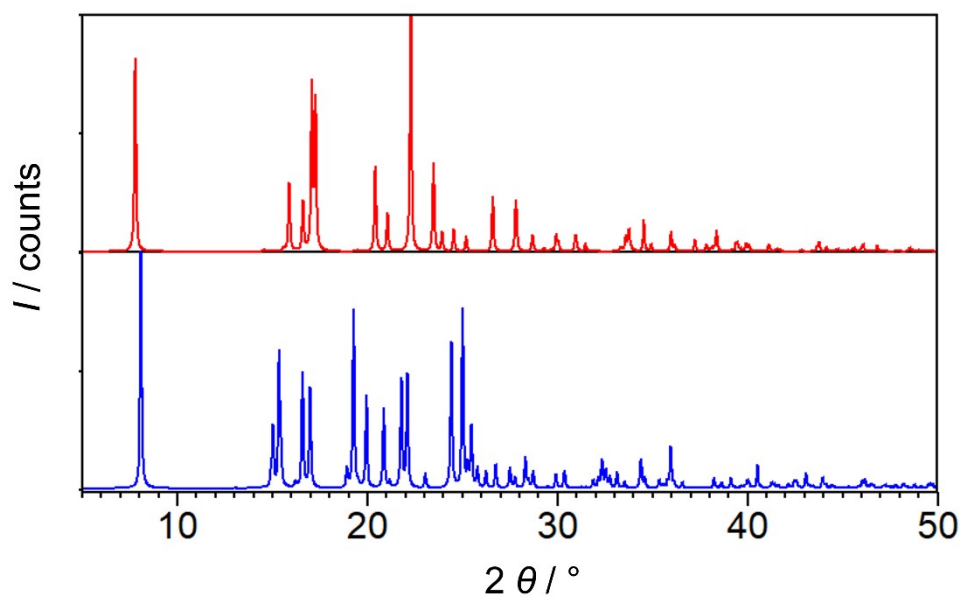

**Figure S1:** The comparison of two enantiomers of (R)- $\alpha$ -phenylethylammonium-oxalate (RAPEAO): monoclinic  $C_2$  space group colored in red and orthorhombic  $Pca2_1$  group colored in blue

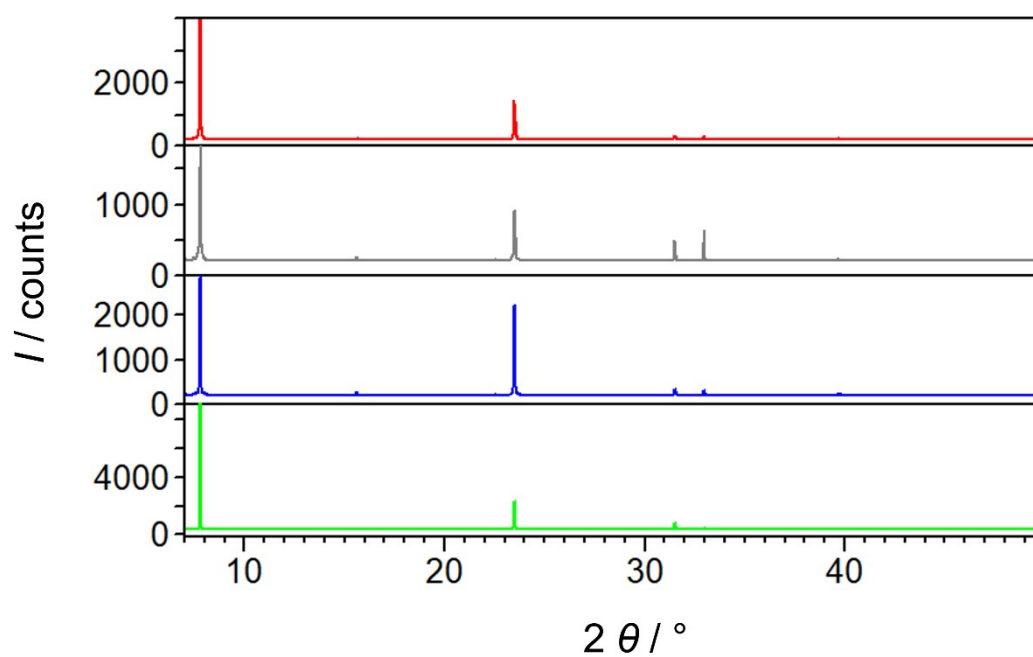

**Figure S2:** The comparison of the BB measurement on the thin film of samples S1 (red curve), S2 (grey curve), S3 (blue curve) and S4 (green curve)

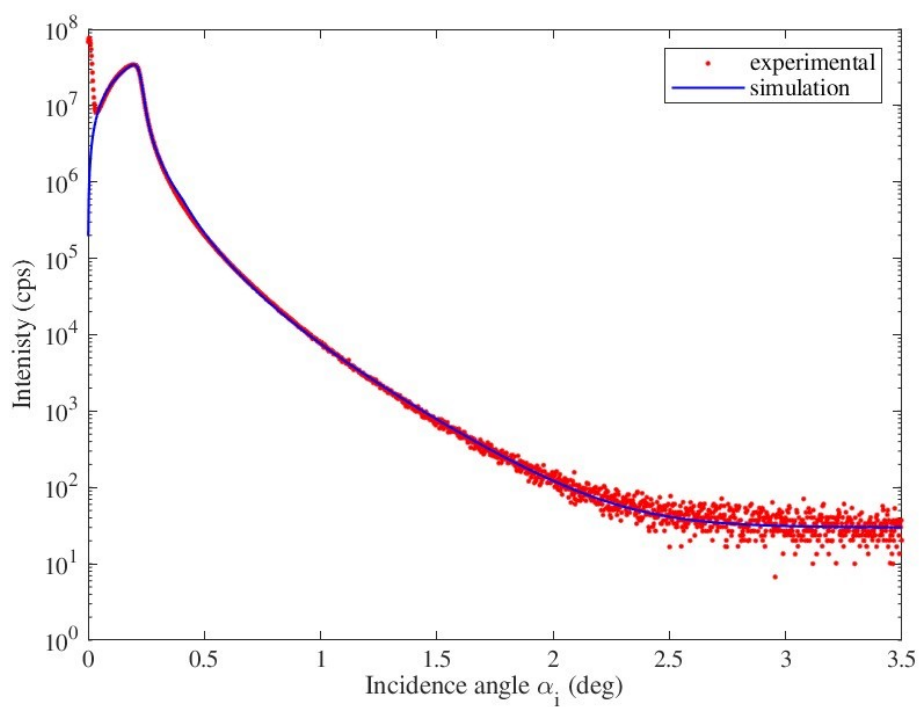

**Figure S3:** Reflectivity measurements of the spin coated RAPEAO.
